# Supplementary material for: Single atom catalysts for boosting electrocatalytic and photoelectrocatalytic performances
Source: Royal Society of Chemistry journal article supplement (doi:10.1039/d1ta01845k), 2021-01-01
Supplement: d1ta01845k1.pdf [file d1ta01845k1.pdf]

## Electronic Supplementary Information

### Single atom catalysts for boosting electrocatalytic and photoelectrocatalytic performances

Shijun Tong,<sup>a</sup> Baihe Fu,<sup>a</sup> Liyong Gan<sup>\*b</sup> and Zhonghai Zhang<sup>\*a</sup>

<sup>a</sup> Shanghai Key Laboratory of Green Chemistry and Chemical Processes, School of Chemistry and Molecular Engineering, East China Normal University, Shanghai 200241, China.

E-mail: [zhzhang@chem.ecnu.edu.cn](mailto:zhzhang@chem.ecnu.edu.cn)

<sup>b</sup> Institute for Structure and Function and Department of Physics, Chongqing University, Chongqing, 400030, China.

E-mail: [ganly@cqu.edu.cn](mailto:ganly@cqu.edu.cn)

#### Table of Contents:

#### **I. Additional Figures and Tables**

**Fig. S1** SEM images of NF.

**Fig. S2** SEM images of (a) Ni/NF and (b) N-Ni/NF.

**Fig. S3** Enlarged AC HAADF-STEM image of Pt single atoms in Fig. 1c.

**Fig. S4** HRTEM image of Pt NPs/N-Ni/NF.

**Fig. S5** Electrochemical HER performance of Ni/NF deposited at (a) different current density and (b) different time; N-Ni/NF annealed at (c) different time with (d) different amounts of  $(\text{NH}_4)_2\text{CO}_3$ , and (e) different temperatures; (f)  $\text{Pt}_1/\text{N-Ni/NF}$  deposited after different potential cycles.

**Fig. S6** LSV curves for HER of NF, Ni/NF, N-Ni/NF, Pt NPs/N-Ni/NF,  $\text{Pt}_1/\text{N-Ni/NF}$ , and Pt/C in 1 M PBS with high current density.

**Fig. S7** LSV curves for HER of  $\text{Pt}_1/\text{N-Ni/NF}$  in acidic, neutral, and alkaline electrolytes.

**Fig. S8** Fitted equivalent circuits of EIS data.

**Fig. S9** AC HAADF-STEM image of  $\text{Pt}_1/\text{N-Ni/NF}$  over 24h stability test.

**Fig. S10** The theoretical and experimental values of  $\text{H}_2$  for HER during 24 stability test of  $\text{Pt}_1/\text{N-Ni/NF}$  at a constant current density of  $10 \text{ mA cm}^{-2}$ .

**Fig. S11** PEC stability measurements on (a) pristine  $\text{Cu}_2\text{O}$  and on (b)  $\text{Pt}_1/\text{N-Ni/Cu}_2\text{O}$  at potential of 0 V vs RHE.

**Fig. S12** Top view of modeled  $\text{Pt}_1/\text{N-Ni}$  SAC with the Pt atom located above the (a) first and (b) second Ni layer. The yellow, red, and pink balls represent Ni, N and Pt atoms, respectively.

**Table R1.** Equivalent circuit model for EIS plots fitting.

**Table S2.** EC HER performance of this work and other reported electrocatalysts in neutral media.

**Table S3.** PEC HER performance of this work and other reported  $\text{Cu}_2\text{O}$  based photocathodes.

#### **II. Additional References**

## I. Additional Figures and Tables

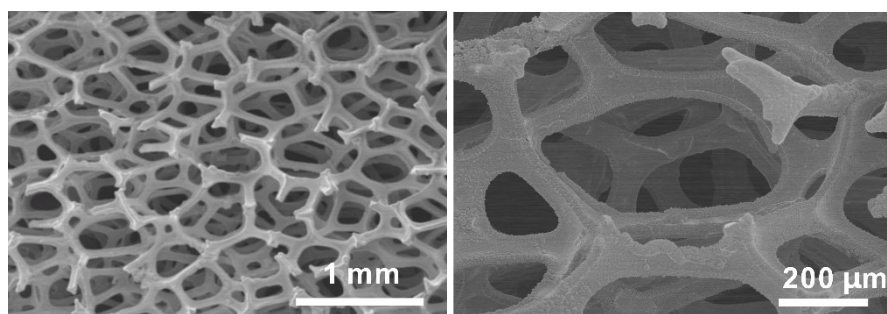

**Fig. S1** SEM images of NF.

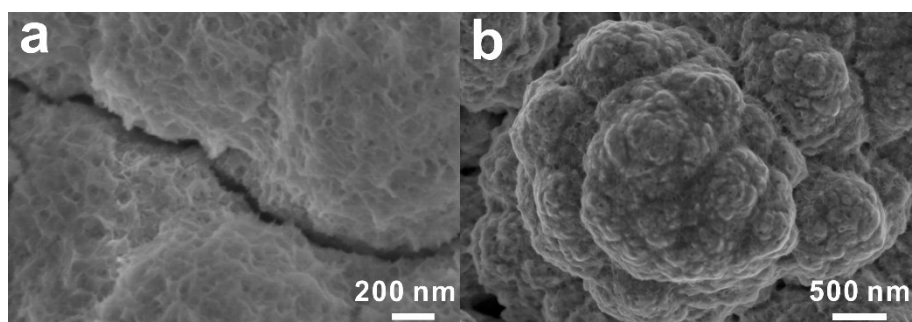

**Fig. S2** SEM images of (a) Ni/NF and (b) N-Ni/NF.

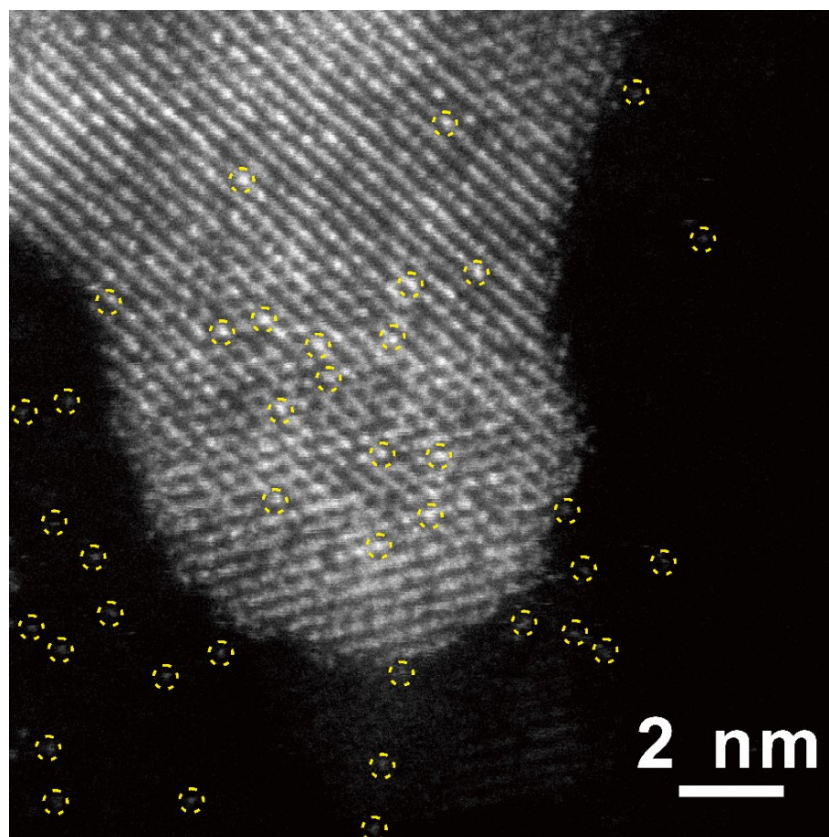

**Fig. S3** Enlarged AC HAADF-STEM image of Pt single atoms in Fig. 1c.

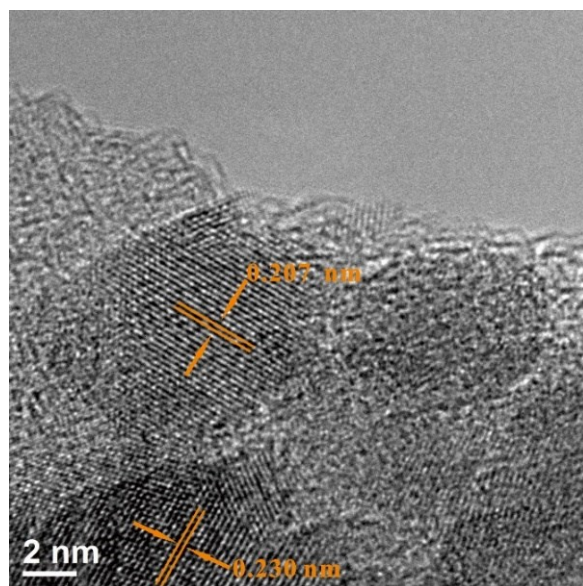

**Fig. S4** HRTEM image of Pt NPs/N-Ni/NF.

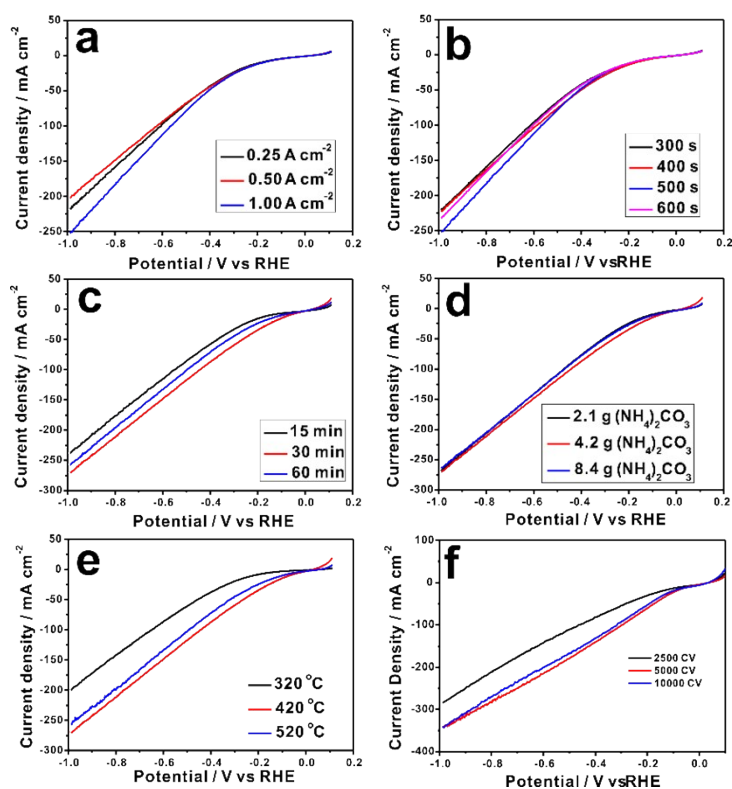

**Fig. S5** Electrochemical HER performance of Ni/NF deposited at (a) different current density and (b) different time; N-Ni/NF annealed at (c) different time with (d) different amounts of (NH<sub>4</sub>)<sub>2</sub>CO<sub>3</sub>, and (e) different temperatures; (f) Pt<sub>1</sub>/N-Ni/NF deposited after different potential cycles.

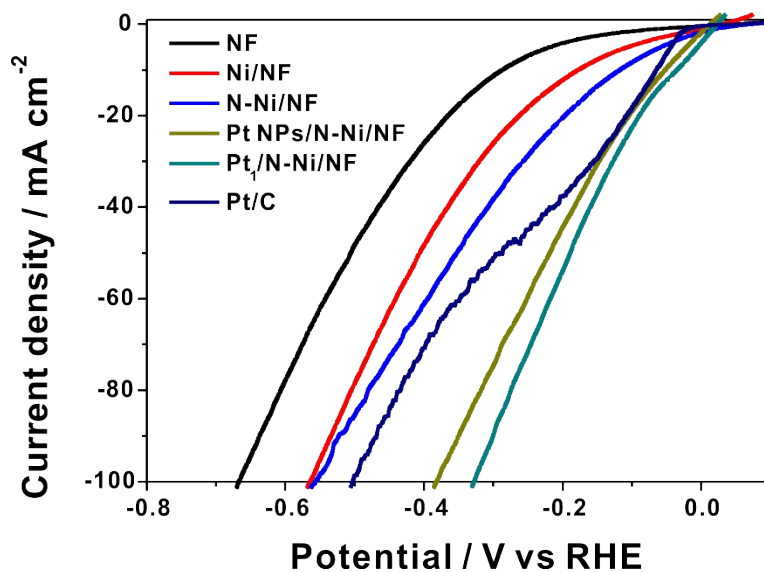

**Fig. S6** LSV curves for HER of NF, Ni/NF, N-Ni/NF, Pt NPs/N-Ni/NF, Pt<sub>1</sub>/N-Ni/NF, and Pt/C in 1 M PBS with high current density.

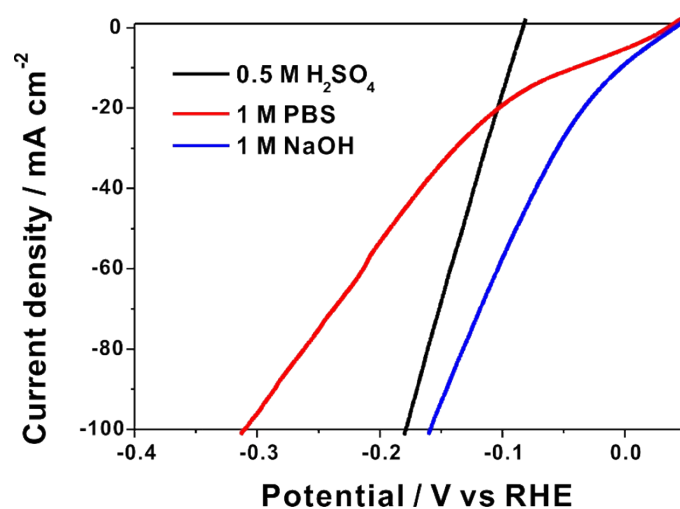

**Fig. S7** LSV curves for HER of Pt<sub>1</sub>/N-Ni/NF in acidic, neutral, and alkaline electrolytes.

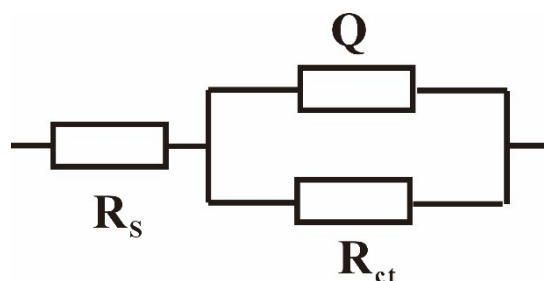

**Fig. S8** Fitted equivalent circuits of EIS data.

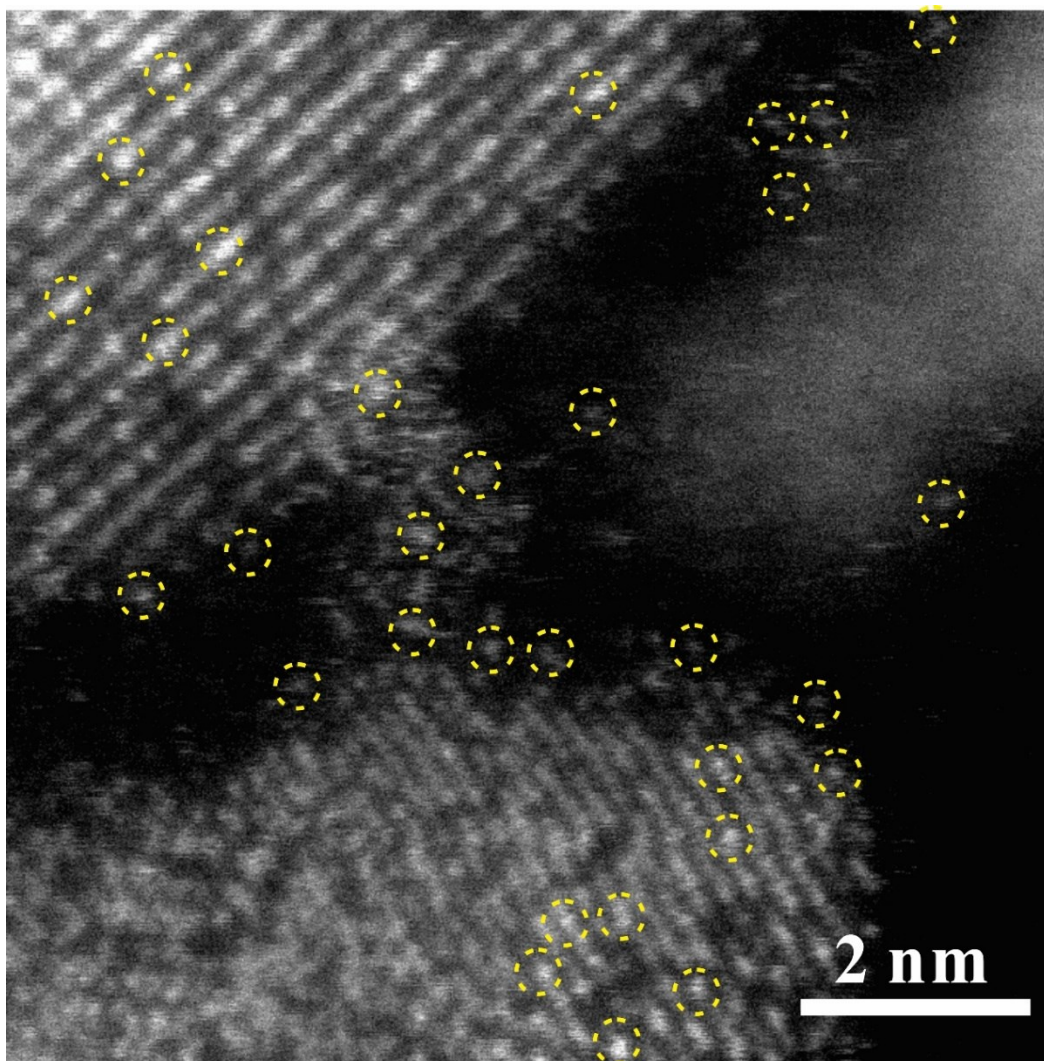

**Fig. S9** AC HAADF-STEM image of Pt<sub>1</sub>/N-Ni/NF over 24h stability test.

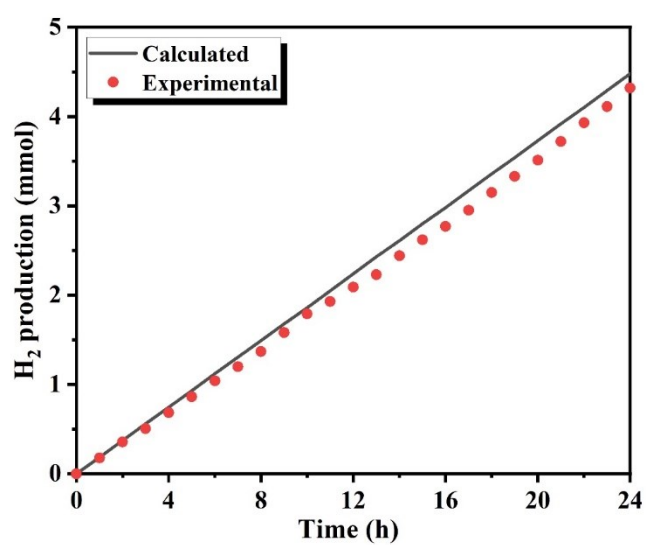

**Fig. S10** The theoretical and experimental values of H<sub>2</sub> for HER during 24 stability test of Pt<sub>1</sub>/N-Ni/NF at a constant current density of 10 mA cm<sup>-2</sup>.

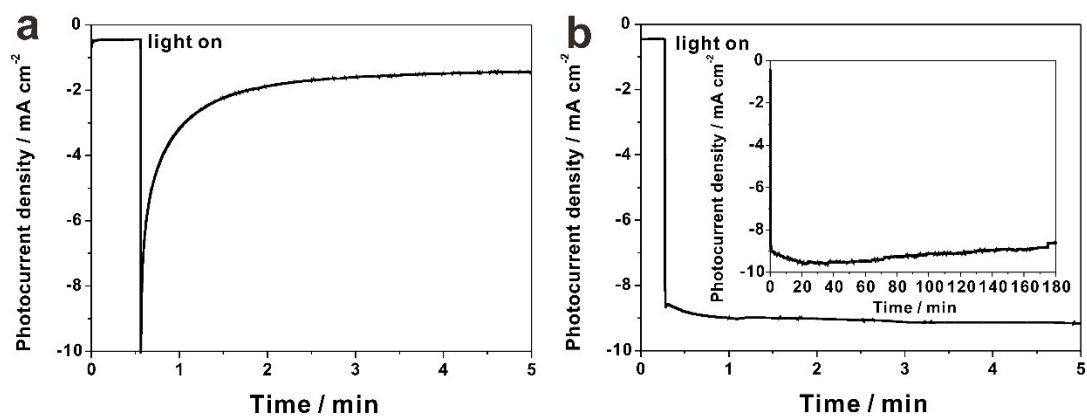

**Fig. S11** PEC stability measurements on (a) pristine  $\text{Cu}_2\text{O}$  and on (b)  $\text{Pt}_1/\text{N-Ni}/\text{Cu}_2\text{O}$  at potential of 0 V vs RHE.

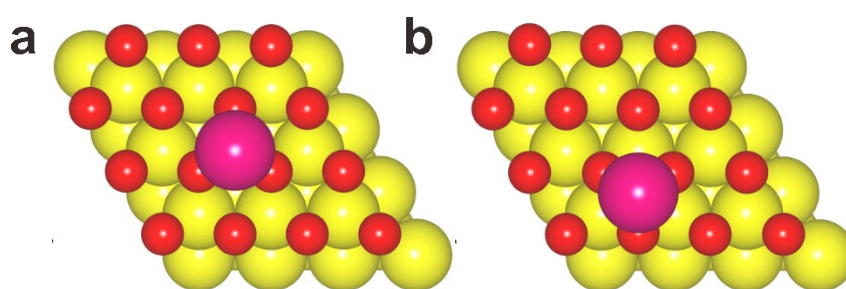

**Fig. S12** Top view of modeled  $\text{Pt}_1/\text{N-Ni}$  SAC with the Pt atom located above the (a) first and (b) second Ni layer. The yellow, red, and pink balls represent Ni, N and Pt atoms, respectively.

**Table R1. Equivalent circuit model for EIS plots fitting.**

| Sample                           | NF       | Ni/NF     | N-Ni/NF | $\text{Pt}_1/\text{N-Ni}/\text{NF}$ |
|----------------------------------|----------|-----------|---------|-------------------------------------|
| $R_s(\text{ohm}/\text{cm}^2)$    | 6.258    | 5.745     | 6.041   | 6.183                               |
| Q                                | 0.000159 | 0.0001787 | 0.01507 | 0.1796                              |
| $R_{ct}(\text{ohm}/\text{cm}^2)$ | 817.2    | 71.16     | 34.06   | 3.313                               |

$R_s$ : solution resistance; Q: capacitance of the double layer;  $R_{ct}$ : charge transfer resistance.

**Table S2. EC HER performance of this work and other reported electrocatalysts in neutral media.**

| Electrocatalyst                              | electrolyte | $^a\eta_{10}$ (mV) | Stability                           | References |
|----------------------------------------------|-------------|--------------------|-------------------------------------|------------|
| $\text{Ni}_{0.33}\text{Co}_{0.67}\text{S}_2$ | 1.0 M PBS   | 72                 | 20 h at 70 mV ( $^b\eta$ )          | S1         |
| $\text{CoO}/\text{CoSe}_2$                   | 0.5 M PBS   | 337                | 9 h at $\sim 337$ mV or 2000 cycles | S2         |
| $\text{SiO}_2/\text{PPy NTs-CFs}$            | 1.0 M PBS   | 183                | 30 h at 200 mV( $\eta$ )            | S3         |
| Co-HNP/CC                                    | 1.0 M PBS   | 85                 | 20 h at $-150$ mA/cm $^2$           | S4         |
| $\text{FeO}_x/\text{FeP}$                    | 1.0 M PBS   | 96                 | 60 h at multi-                      | S5         |

|                                                                  |                                                     |       | potential( $\eta$ )                                   |     |
|------------------------------------------------------------------|-----------------------------------------------------|-------|-------------------------------------------------------|-----|
| NiCoP <sub>x</sub>                                               | 1.0 M PBS                                           | 63    | 30 h at -100 mV( $\eta$ )                             | S6  |
| N-Ni                                                             | 1.0 M PBS                                           | 64    | 18 h at -20 mA/cm <sup>2</sup>                        | S7  |
| CrO <sub>x</sub> /Cu-Ni/Cu foam                                  | 1.0 M PBS                                           | 48    | 24 h at 100 mV( $\eta$ )                              | S8  |
| Ni <sub>0.89</sub> Co <sub>0.11</sub> Se <sub>2</sub><br>MNSN/NF | 1.0 M PBS                                           | 82    | 40 h at 200 mV( $\eta$ )                              | S9  |
| Ni <sub>0.1</sub> Co <sub>0.9</sub> P                            | 1.0 M PBS                                           | 125   | 20 h at -30 mA/cm <sup>2</sup>                        | S10 |
| CoMoS <sub>4</sub> NTA/CC                                        | 1.0 M PBS                                           | 104   | 32 h at 142 mV( $\eta$ )                              | S11 |
| Mn-Co-P/Ti                                                       | 1.0 M PBS                                           | 86    | 10 h at 96 mV( $\eta$ ) or<br>1000 cycles             | S12 |
| FeP/Ti                                                           | 1.0 M PBS                                           | 102   | 16 h at -10 mA/cm <sup>2</sup>                        | S13 |
| CoW(OH) <sub>x</sub>                                             | 1.0 M PBS                                           | 73.6  | 70 h at -20 mA/cm <sup>2</sup>                        | S14 |
| Ni-Mo-S/C                                                        | 0.5 M PBS                                           | 200   | 30000 s                                               | S15 |
| GC Cu-Cu <sub>x</sub> O-Pt-1                                     | 2.0 M PBS                                           | 35    | 100 h at 55 mV( $\eta$ )                              | S16 |
| CoP/CC                                                           | 1.0 M PBS                                           | 106   | 1000 cycles                                           | S17 |
| MoP <sub>2</sub> /MoP                                            | 1.0 M PBS                                           | 75    | 4000 cycles                                           | S18 |
| Ni/NiMoN array                                                   | 0.5 M Na <sub>2</sub> SO <sub>4</sub><br>+0.5 M PBS | 37    | 24 h at 37 mV( $\eta$ )                               | S19 |
| Mn-Ni-S/NF                                                       | 1.0 M PBS                                           | 84    | 24 h at 180 mV( $\eta$ ) or<br>5000 cycles            | S20 |
| v-NiFe LDH                                                       | 1.0 M PBS                                           | 87    | 1000 cycles                                           | S21 |
| Fe@N-CNT/IF                                                      | 1.0 M PBS                                           | 130   | 10 h at multi-<br>potential( $\eta$ )                 | S22 |
| Zn <sub>0.075</sub> S-C <sub>0.925</sub> P<br>NRCs/CP            | 1.0 M PBS                                           | 67    | 20 h at -10 mA/cm <sup>2</sup> or<br>1000 cycles      | S23 |
| N-CoP/CC                                                         | 1.0 M PBS                                           | 74    | 30 h at -10 mA/cm <sup>2</sup> or<br>1000 cycles      | S24 |
| PEI@NiP <sub>2</sub> -CC                                         | 1.0 M PBS                                           | 100   | 20 h at -10 mA/cm <sup>2</sup>                        | S25 |
| Ru@SC-CDs                                                        | 1.0 M PBS                                           | 66    | 5000 cycles                                           | S26 |
| FePSe <sub>3</sub> /NC                                           | 1.0 M PBS                                           | 140.1 | 24 h at -10 mA/cm <sup>2</sup>                        | S27 |
| Ru-RuO <sub>2</sub> /CNT                                         | 1.0 M PBS                                           | 48    | 10 h at 40 mV( $\eta$ ) or<br>1500 cycles             | S28 |
| RuS <sub>x</sub> /S-GO                                           | 1.0 M PBS                                           | 46    | 12 h for -50 mA/cm <sup>2</sup>                       | S29 |
| W-CoP NAs/CC                                                     | 1.0 M PBS                                           | 102   | 36 h at 102 mV( $\eta$ ) or<br>2000 cycles            | S30 |
| NFP/C                                                            | 1.0 M PBS                                           | 117   | 12 h at -10 mA/cm <sup>2</sup>                        | S31 |
| Co <sub>0.6</sub> Fe <sub>0.4</sub> P/CNT                        | 1.0 M PBS                                           | 105   | 24 h for -10 mA/cm <sup>2</sup><br>or 5000 ADT cycles | S32 |
| (Fe <sub>0.048</sub> Ni <sub>0.952</sub> ) <sub>2</sub> P        | 1.0 M PBS                                           | 90    | 20 h for -100 mA/cm <sup>2</sup><br>or 1000 cycles    | S33 |
| CoP/Co-MOF                                                       | 1.0 M PBS                                           | 49    | 60000 s at -20<br>mA/cm <sup>2</sup> or 2000          | S34 |

|                                                      |            |     | cycles                                             |           |
|------------------------------------------------------|------------|-----|----------------------------------------------------|-----------|
| VN@Ni <sub>3</sub> N-Ni-6/CC                         | 1.0 M PBS  | 85  | 30 h at 85 mV( $\eta$ ) or 3000 cycles             | S35       |
| np-Co <sub>9</sub> S <sub>4</sub> P <sub>4</sub>     | 1.0 M PBS  | 87  | 20 h for -10 mA/cm <sup>2</sup>                    | S36       |
| N-Co <sub>2</sub> P/CC                               | 1.0 M PBS  | 42  | 120000 s for -10 mA/cm <sup>2</sup> or 3000 cycles | S37       |
| Karst NF                                             | 1.0 M PBS  | 110 | 10 h at 210 mV( $\eta$ )                           | S38       |
| CoS <sub>x</sub> -(0.2-0.02)-12                      | 1.0 M PBS  | 182 | 20 h at -10 mA/cm <sup>2</sup>                     | S39       |
| Mn-NiO-Ni/Ni-F                                       | 1.0 M PBS  | 80  | 55 h at 80 mV( $\eta$ )                            | S40       |
| Ni(S <sub>0.5</sub> Se <sub>0.5</sub> ) <sub>2</sub> | 1.0 M PBS  | 124 | 20 h at 125 mV( $\eta$ ) or 2000 cycles            | S41       |
| Cu <sub>0.08</sub> Co <sub>0.92</sub> P NAs/CP       | 1.0 M PBS  | 81  | 20 h at -10 mA/cm <sup>2</sup> or 3000 cycles      | S42       |
| Ni <sub>0.85</sub> Se@NC                             | 1.0 M PBS  | 183 | 10 h at 183 mV( $\eta$ ) or 2000 cycles            | S43       |
| RhCoB                                                | 1.0 M PBS  | 113 | 10 h at -10 mA/cm <sup>2</sup> or 2000 cycles      | S44       |
| 3D RuCu NCs                                          | 0.01 M PBS | 73  | 12 h for ~ -10 mA/cm <sup>2</sup> or 3000 cycles   | S45       |
| Fe-(NiS <sub>2</sub> /MoS <sub>2</sub> )/CNT         | 1.0 M PBS  | 127 | 8 h at -10 mA/cm <sup>2</sup>                      | S46       |
| Pt <sub>1</sub> /N-Ni/NF                             | 1.0 M PBS  | 33  | 24 h at -10 mA/cm <sup>2</sup>                     | This work |

<sup>a</sup>  $\eta_{10}$  = overpotential required to reach current density of -10 mA/cm<sup>2</sup>. <sup>b</sup>  $\eta$  = overpotential.



**Table S3. PEC HER performance of this work and other reported Cu<sub>2</sub>O based photocathodes.**

| Photoelectrode                                                             | Photocurrent density (mA cm <sup>-2</sup> )<br>at 0 V vs RHE | References       |
|----------------------------------------------------------------------------|--------------------------------------------------------------|------------------|
| NiMo/Ga <sub>2</sub> O <sub>3</sub> /Cu <sub>2</sub> O NWs                 | 10                                                           | S47              |
| RuOx/TiO <sub>2</sub> /AZO/Cu <sub>2</sub> O NWs                           | 10                                                           | S48              |
| Pt/TiO <sub>2</sub> /AZO/Cu <sub>2</sub> O                                 | 7.6                                                          | S49              |
| TiO <sub>2</sub> /Ga <sub>2</sub> O <sub>3</sub> /Cu <sub>2</sub> O/CuSCN  | 6.4                                                          | S50              |
| RuO <sub>2</sub> /TiO <sub>2</sub> /AZO/Cu <sub>2</sub> O                  | 5.16                                                         | S51              |
| NiS/Cu <sub>2</sub> O/Al                                                   | 5.0                                                          | S52              |
| Ti <sub>3</sub> C <sub>2</sub> T <sub>x</sub> /Cu <sub>2</sub> O           | 4.45                                                         | S53              |
| Ni/CuO/Cu <sub>2</sub> O                                                   | 4.3                                                          | S54              |
| Pt/TiO <sub>2</sub> /AZO/Ga <sub>2</sub> O <sub>3</sub> /Cu <sub>2</sub> O | 4.0                                                          | S55              |
| Cu <sub>2</sub> MoS <sub>4</sub> /NiO/Cu <sub>2</sub> O                    | 1.25                                                         | S56              |
| <b>Pt<sub>1</sub>N-Ni/NF</b>                                               | <b>11.9</b>                                                  | <b>This work</b> |

## II. Additional References

- (S1) Peng, Z.; Jia, D.; Al-Enizi, A. M.; Elzatahry, A. A.; Zheng, G. From Water Oxidation to Reduction: Homologous Ni–Co Based Nanowires as Complementary Water Splitting Electrocatalysts. *Adv. Energy Mater.* **2015**, *5*, 1402031.
- (S2) Li, K.; Zhang, J.; Wu, R.; Yu, Y.; Zhang, B. Anchoring CoO Domains on CoSe<sub>2</sub> Nanobelts as Bifunctional Electrocatalysts for Overall Water Splitting in Neutral Media. *Adv. Sci.* **2016**, *3*, 1500426.
- (S3) Feng, J. X.; Han, X.; Ye, S. H.; Ouyang, G.; Tong, Y. X.; Li, G. R. Silica–Polypyrrole Hybrids as High-Performance Metal-Free Electrocatalysts for the Hydrogen Evolution Reaction in Neutral Media. *Angew. Chem. Int. Ed.* **2017**, *56*, 8120-8124.
- (S4) Liu, B.; Zhang, L.; Xiong, W.; Ma, M. Cobalt-Nanocrystal-Assembled Hollow Nanoparticles for Electrocatalytic Hydrogen Generation from Neutral-pH Water. *Angew. Chem. Int. Ed.* **2016**, *55*, 6725-6729.
- (S5) Huang, J.; Su, Y.; Zhang, Y.; Wu, W.; Wu, C.; Sun, Y.; Lu, R.; Zou, G.; Li, Y.; Xiong, J. FeO<sub>x</sub>/FeP hybrid nanorods neutral hydrogen evolution electrocatalysis: insight into interface. *J. Mater. Chem. A* **2018**, *6*, 9467-9472.
- (S6) Zhang, R.; Wang, X.; Yu, S.; Wen, T.; Zhu, X.; Yang, F.; Sun, X.; Wang, X.; Hu, W. Ternary NiCo<sub>2</sub>P<sub>x</sub> Nanowires as pH-Universal Electrocatalysts for Highly Efficient Hydrogen Evolution Reaction. *Adv. Mater.* **2017**, *29*, 1605502.

- (S7) You, B.; Liu, X.; Hu, G.; Gul, S.; Yano, J.; Jiang, D.; Sun, Y. Universal Surface Engineering of Transition Metals for Superior Electrocatalytic Hydrogen Evolution in Neutral Water. *J. Am. Chem. Soc.* **2017**, *139*, 12283-12290.
- (S8) Dinh, C. T.; Jain, A.; García de Arquer, F. P.; Luna, P. D.; Li, J.; Wang, N.; Zheng, X.; Cai, J.; Gregory, B. Z.; Voznyy, O.; Zhang, B.; Liu, M.; Sinton, D.; Crumlin, E. J.; Sargent, E. H. Multi-site electrocatalysts for hydrogen evolution in neutral media by destabilization of water molecules. *Nat Energy* **2019**, *4*, 107-114.
- (S9) Liu, B.; Zhao, Y. F.; Peng, H. Q.; Zhang, Z. Y.; Sit, C. K.; Yuen, M. F.; Zhang, T. R.; Lee, C. S.; Zhang, W. J. Nickel–Cobalt Diselenide 3D Mesoporous Nanosheet Networks Supported on Ni Foam: An All-pH Highly Efficient Integrated Electrocatalyst for Hydrogen Evolution. *Adv. Mater.* **2017**, *29*, 1606521.
- (S10) Wu, R.; Xiao, B.; Gao, Q.; Zheng, Y. R.; Zheng, X. S.; Zhu, J. F.; Gao, M. R.; Yu, S. H. A Janus Nickel Cobalt Phosphide Catalyst for High-Efficiency Neutral-pH Water Splitting. *Angew. Chem. Int. Ed.* **2018**, *130*, 15671-15675.
- (S11) Wang, W.; Ren, X.; Hao, S.; Liu, Z.; Xie, F.; Yao, Y.; Asiri, A. M.; Chen, L.; Sun, X. Self-Templating Construction of Hollow Amorphous CoMoS<sub>4</sub> Nanotube Array towards Efficient Hydrogen Evolution Electrocatalysis at Neutral pH. *Chem. Eur. J.* **2017**, *23*, 12718-12723.
- (S12) Liu, T.; Ma, X.; Liu, D.; Hao, S.; Du, G.; Ma, Y.; Asiri, A. M.; Sun, X.; Chen, L. Mn Doping of CoP Nanosheets Array: An Efficient Electrocatalyst for Hydrogen Evolution Reaction with Enhanced Activity at All pH Values. *ACS Catal.* **2017**, *7*, 98-102.
- (S13) Callejas, J. F.; McEnaney, J. M.; Read, C. G.; Crompton, J. C.; Biacchi, A. J.; Popczun, E. J.; Gordon, T. R.; Lewis, N. S.; Schaak, R. E. Electrocatalytic and Photocatalytic Hydrogen Production from Acidic and Neutral-pH Aqueous Solutions Using Iron Phosphide Nanoparticles. *ACS Nano* **2014**, *8*, 11101-11107.
- (S14) Zhang, L.; Liu, P. F.; Li, Y. H.; Wang, C. W.; Zu, M. Y.; Fu, H. Q.; Yang, X. H.; Yang, H. G. Accelerating Neutral Hydrogen Evolution with Tungsten Modulated Amorphous Metal Hydroxides. *ACS Catal.* **2018**, *8*, 5200-5205.
- (S15) Miao, J.; Xiao, F. X.; Yang, H. B.; Khoo, S. Y.; Chen, J.; Fan, Z.; Hsu, Y. Y.; Chen, H. M.; Zhang, H.; Liu, B. Hierarchical Ni-Mo-S nanosheets on carbon fiber cloth: A flexible electrode for efficient hydrogen generation in neutral electrolyte. *Sci. Adv.* **2015**, *1*, e1500259.
- (S16) Zhang, P.; Wang, M.; Chen, H.; Liang, Y.; Sun, J.; Sun, L. A Cu-Based Nanoparticulate Film as Super-Active and Robust Catalyst Surpasses Pt for Electrochemical H<sub>2</sub> Production from Neutral and Weak Acidic Aqueous Solutions. *Adv. Energy Mater.* **2016**, *6*, 1502319.

- (S17) Tian, J.; Liu, Q.; Asiri, A. M.; Sun, X. Self-Supported Nanoporous Cobalt Phosphide Nanowire Arrays: An Efficient 3D Hydrogen-Evolving Cathode over the Wide Range of pH 0–14. *J. Am. Chem. Soc.* **2014**, *136*, 7587-7590.
- (S18) Xie, X.; Song, M.; Wang, L.; Engelhard, M. H.; Luo, L.; Miller, A.; Zhang, Y.; Du, L.; Pan, H.; Nie, Z.; Chu, Y.; Estevez, L.; Wei, Z.; Liu, H.; Wang, C.; Li, D.; Shao, Y. Electrocatalytic Hydrogen Evolution in Neutral pH Solutions: Dual-Phase Synergy. *ACS Catal.* **2019**, *9*, 8712-8718.
- (S19) Shang, L.; Zhao, Y.; Kong, X. Y.; Shi, R.; Waterhouse, G. I. N.; Wen, L.; Zhang, T. Underwater superaerophobic Ni nanoparticle-decorated nickel-molybdenum nitride nanowire arrays for hydrogen evolution in neutral media. *Nano Energy* **2020**, *78*, 105375.
- (S20) Zeng, L.; Liu, Z.; Sun, K.; Chen, Y.; Zhao, J.; Chen, Y.; Pan, Y.; Lu, Y.; Liu, Y.; Liu, C. Multiple modulations of pyrite nickel sulfides via metal heteroatom doping engineering for boosting alkaline and neutral hydrogen evolution. *J. Mater. Chem. A* **2019**, *7*, 25628-25640.
- (S21) Yuan, Z.; Bak, S. M.; Li, P.; Jia, Y.; Zheng, L.; Zhou, Y.; Bai, L.; Hu, E.; Yang, X. Q.; Cai, Z.; Sun, Y.; Sun, X. Activating Layered Double Hydroxide with Multivacancies by Memory Effect for Energy-Efficient Hydrogen Production at Neutral pH. *ACS Energy Lett.* **2019**, *4*, 1412-1418.
- (S22) Yu, J.; Li, G.; Liu, H.; Zeng, L.; Zhao, L.; Jia, J.; Zhang, M.; Zhou, W.; Liu, H.; Hu, Y. Electrochemical Flocculation Integrated Hydrogen Evolution Reaction of Fe@N-Doped Carbon Nanotubes on Iron Foam for Ultralow Voltage Electrolysis in Neutral Media. *Adv. Sci.* **2019**, *6*, 1901458.
- (S23) Yan, L.; Zhang, B.; Zhu, J.; Liu, Z.; Zhang, H.; Li, Y. Callistemon-like Zn and S codoped CoP nanorod clusters as highly efficient electrocatalysts for neutral-pH overall water splitting. *J. Mater. Chem. A* **2019**, *7*, 22453-22462.
- (S24) Men, Y.; Li, P.; Yang, F.; Cheng, G.; Chen, S.; Luo, W. Nitrogen-doped CoP as robust electrocatalyst for high-efficiency pH universal hydrogen evolution reaction. *Appl. Catal. B: Environ.* **2019**, *253*, 21-27.
- (S25) Ding, Y.; Miao, B. Q.; Jiang, Y. C.; Yao, H. C.; Li, X. F.; Chen, Y. Polyethylenimine-modified nickel phosphide nanosheets: interfacial protons boost the hydrogen evolution reaction. *J. Mater. Chem. A* **2019**, *7*, 13770-13776.
- (S26) Liu, Y.; Yang, Y.; Peng, Z.; Liu, Z.; Chen, Z.; Shang, L.; Lu, S.; Zhang, T. Self-crosslinking carbon dots loaded ruthenium dots as an efficient and super-stable hydrogen production electrocatalyst at all pH values. *Nano Energy* **2019**, *65*, 104023.

- (S27) Yu, J.; Li, W. J.; Zhang, H.; Zhou, F.; Li, R.; Xu, C. Y.; Zhou, L.; Zhong, H.; Wang, J. Metallic FePSe<sub>3</sub> nanoparticles anchored on N-doped carbon framework for All-pH hydrogen evolution reaction. *Nano Energy* **2019**, *57*, 222-229.
- (S28) Zhang, M.; Chen, J.; Li, H.; Cai, P.; Li, Y.; Wen, Z. Ru-RuO<sub>2</sub>/CNT hybrids as high-activity pH-universal electrocatalysts for water splitting within 0.73 V in an asymmetric-electrolyte electrolyzer. *Nano Energy* **2019**, *61*, 576-583.
- (S29) Li, P.; Duan, X.; Wang, S.; Zheng, L.; Li, Y.; Duan, H.; Kuang, Y.; Sun, X. Amorphous Ruthenium-Sulfide with Isolated Catalytic Sites for Pt-Like Electrocatalytic Hydrogen Production Over Whole pH Range. *Small* **2019**, *15*, 1904043.
- (S30) Wang, X.; Chen, Y.; Yu, B.; Wang, Z.; Wang, H.; Sun, B.; Li, W.; Yang, D.; Zhang, W. Hierarchically Porous W-Doped CoP Nanoflake Arrays as Highly Efficient and Stable Electrocatalyst for pH-Universal Hydrogen Evolution. *Small* **2019**, *15*, 1902613.
- (S31) Lu, X. F.; Yu, L.; Lou, X. W. D. Highly crystalline Ni-doped FeP/carbon hollow nanorods as all-pH efficient and durable hydrogen evolving electrocatalysts. *Sci. Adv.* **2019**, *5*, eaav6009.
- (S32) Zhang, X.; Zhang, X.; Xu, H.; Wu, Z.; Wang, H.; Liang, Y. Iron-Doped Cobalt Monophosphide Nanosheet/Carbon Nanotube Hybrids as Active and Stable Electrocatalysts for Water Splitting. *Adv. Funct. Mater.* **2017**, *27*, 1606635.
- (S33) Zhang, W.; Zou, Y.; Liu, H.; Chen, S.; Wang, X.; Zhang, H.; She, X.; Yang, D. Single-crystalline (Fe<sub>x</sub>Ni<sub>1-x</sub>)<sub>2</sub>P nanosheets with dominant {011<sup>-</sup>1<sup>-</sup>} facets: Efficient electrocatalysts for hydrogen evolution reaction at all pH values. *Nano Energy* **2019**, *56*, 813-822.
- (S34) Liu, T.; Li, P.; Yao, N.; Cheng, G.; Chen, S.; Luo, W.; Yin, Y. CoP-Doped MOF-Based Electrocatalyst for pH-Universal Hydrogen Evolution Reaction. *Angew. Chem. Int. Ed.* **2019**, *131*, 4727-4732.
- (S35) Dong, X.; Yan, H.; Jiao, Y.; Guo, D.; Wu, A.; Yang, G.; Shi, X.; Tian, C.; Fu, H. 3D hierarchical V-Ni-based nitride heterostructure as a highly efficient pH-universal electrocatalyst for the hydrogen evolution reaction. *J. Mater. Chem. A* **2019**, *7*, 15823-15830.
- (S36) Tan, Y.; Luo, M.; Liu, P.; Cheng, C.; Han, J.; Watanabe, K.; Chen, M. Three-Dimensional Nanoporous Co<sub>9</sub>S<sub>4</sub>P<sub>4</sub> Pentlandite as a Bifunctional Electrocatalyst for Overall Neutral Water Splitting. *ACS Appl. Mater. Interfaces* **2019**, *11*, 3880-3888.
- (S37) Men, Y.; Li, P.; Zhou, J.; Cheng, G.; Chen, S.; Luo, W. Tailoring the Electronic Structure of Co<sub>2</sub>P by N Doping for Boosting Hydrogen Evolution Reaction at All pH Values. *ACS Catal.* **2019**, *9*, 3744-3752.

- (S38) Gao, X.; Chen, Y.; Sun, T.; Huang, J.; Zhang, W.; Wang, Q.; Cao, R. Karst landform-featured monolithic electrode for water electrolysis in neutral media. *Energy Environ. Sci.* **2020**, *13*, 174-182.
- (S39) He, W.; Ifraemov, R.; Raslin, A.; Hod, I. Room-Temperature Electrochemical Conversion of Metal–Organic Frameworks into Porous Amorphous Metal Sulfides with Tailored Composition and Hydrogen Evolution Activity. *Adv. Funct. Mater.* **2018**, *28*, 1707244.
- (S40) Lu, X.; Pan, J.; Lovell, E.; Tan, T. H.; Ng, Y. H.; Amal, R. A sea-change: manganese doped nickel/nickel oxide electrocatalysts for hydrogen generation from seawater. *Energy Environ. Sci.* **2018**, *11*, 1898-1910.
- (S41) Zeng, L.; Sun, K.; Chen, Y.; Liu, Z.; Chen, Y.; Pan, Y.; Zhao, R.; Liu, Y.; Liu, C. Neutral-pH overall water splitting catalyzed efficiently by a hollow and porous structured ternary nickel sulfoselenide electrocatalyst. *J. Mater. Chem. A* **2019**, *7*, 16793-16802.
- (S42) Yan, L.; Zhang, B.; Zhu, J.; Li, Y.; Tsiakaras, P.; Shen, P. K. Electronic modulation of cobalt phosphide nanosheet arrays via copper doping for highly efficient neutral-pH overall water splitting. *Appl. Catal. B: Environ.* **2020**, *265*, 118555.
- (S43) Huang, Z.; Xu, B.; Li, Z.; Ren, J.; Mei, H.; Liu, Z.; Xie, D.; Zhang, H.; Dai, F.; Wang, R.; Sun, D. Accurately Regulating the Electronic Structure of Ni<sub>x</sub>Se<sub>y</sub>@NC Core–Shell Nanohybrids through Controllable Selenization of a Ni-MOF for pH-Universal Hydrogen Evolution Reaction. *Small* **2020**, *16*, 2004231.
- (S44) Deng, K.; Ren, T.; Xu, Y.; Liu, S.; Dai, Z.; Wang, Z.; Li, X.; Wang, L.; Wang, H. Transition metal M (M = Co, Ni, and Fe) and boron co-modulation in Rh-based aerogels for highly efficient and pH-universal hydrogen evolution electrocatalysis. *J. Mater. Chem. A* **2020**, *8*, 5595-5600.
- (S45) Cao, D.; Wang, J.; Xu, H.; Cheng, D. Growth of Highly Active Amorphous RuCu Nanosheets on Cu Nanotubes for the Hydrogen Evolution Reaction in Wide pH Values. *Small* **2020**, *16*, 2000924.
- (S46) Li, C.; Liu, M.; Ding, H.; He, L.; Wang, E.; Wang, B.; Fan, S.; Liu, K. A lightly Fe-doped (NiS<sub>2</sub>/MoS<sub>2</sub>)/carbon nanotube hybrid electrocatalyst film with laser-drilled micropores for stabilized overall water splitting and pH-universal hydrogen evolution reaction. *J. Mater. Chem. A* **2020**, *8*, 17527-17536.
- (S47) Pan, L.; Kim, J. H.; Mayer, M. T.; Son, M. K.; Ummadisingu, A.; Lee, J. S.; Hagfeldt, A.; Luo, J.; Grätzel, M. Boosting the performance of Cu<sub>2</sub>O photocathodes for unassisted solar water splitting devices. *Nat. Catal.* **2018**, *1*, 412-420.

- (S48) Luo, J.; Steier, L.; Son, M. K.; Schreier, M.; Mayer, M. T.; Grätzel, M. Cu<sub>2</sub>O Nanowire Photocathodes for Efficient and Durable Solar Water Splitting. *Nano. Lett.* **2016**, *16*, 1848-1857.
- (S49) Paracchino, A.; Laporte, V.; Sivula, K.; Grätzel, M.; Thimsen, E. Highly active oxide photocathode for photoelectrochemical water reduction. *Nat. Mater.* **2011**, *10*, 456-461.
- (S50) Pan, L.; Liu, Y.; Yao, L.; Ren, D.; Sivula, K.; Grätzel, M.; Hagfeldt, A. Cu<sub>2</sub>O photocathodes with band-tail states assisted hole transport for standalone solar water splitting. *Nat. Commun.* **2020**, *11*, 318.
- (S51) Chen, D.; Liu, Z.; Guo, Z.; Yan, W.; Ruan, M. Decorating Cu<sub>2</sub>O photocathode with noble-metal-free Al and NiS cocatalysts for efficient photoelectrochemical water splitting by light harvesting management and charge separation design. *Chem. Eng. J.* **2020**, *381*, 122655.
- (S52) Tilley, S. D.; Schreier, M.; Azevedo, J.; Stefik, M.; Graetzel, M. Ruthenium Oxide Hydrogen Evolution Catalysis on Composite Cuprous Oxide Water-Splitting Photocathodes. *Adv. Funct. Mater.* **2014**, *24*, 303-311.
- (S53) Fu, X.; Chang, H.; Shang, Z.; Liu, P.; Liu, J.; Luo, H. Three-dimensional Cu<sub>2</sub>O nanorods modified by hydrogen treated Ti<sub>3</sub>C<sub>2</sub>T<sub>x</sub> MXene with enriched oxygen vacancies as a photocathode and a tandem cell for unassisted solar water splitting. *Chem. Eng. J.* **2020**, *381*, 122001.
- (S54) Dubale, A. A.; Pan, C. J.; Tamirat, A. G.; Chen, H. M.; Su, W. N.; Chen, C. H.; Rick, J.; Ayele, D. W.; Aragaw, B. A.; Lee, J. F.; Yang, Y. W.; Hwang, B. J. Heterostructured Cu<sub>2</sub>O/CuO decorated with nickel as a highly efficient photocathode for photoelectrochemical water reduction. *J. Mater. Chem. A* **2015**, *3*, 12482-12499.
- (S55) Wang, Y. C.; Qin, C.; Lou, Z. R.; Lu, Y. F.; Zhu, L. P. Cu<sub>2</sub>O photocathodes for unassisted solar water-splitting devices enabled by noble metal cocatalysts simultaneously as hydrogen evolution catalysts and protection layers. *Nanotechnology* **2019**, *30*, 495407.
- (S56) Yang, C.; Tran, P. D.; Boix, P. P.; Bassi, P. S.; Yantara, N.; Wong, L. H.; Barber, J. Engineering a Cu<sub>2</sub>O/NiO/Cu<sub>2</sub>MoS<sub>4</sub> hybrid photocathode for H<sub>2</sub> generation in water. *Nanoscale* **2014**, *6*, 6506-6510.
